# Supplementary material
Source: PubMed Central journal article supplement (PMC8006418)
Supplement: jiaa788_suppl_supplementary_figure_1.pdf [file jiaa788_suppl_supplementary_figure_1.pdf]

## Supplementary Figure 1

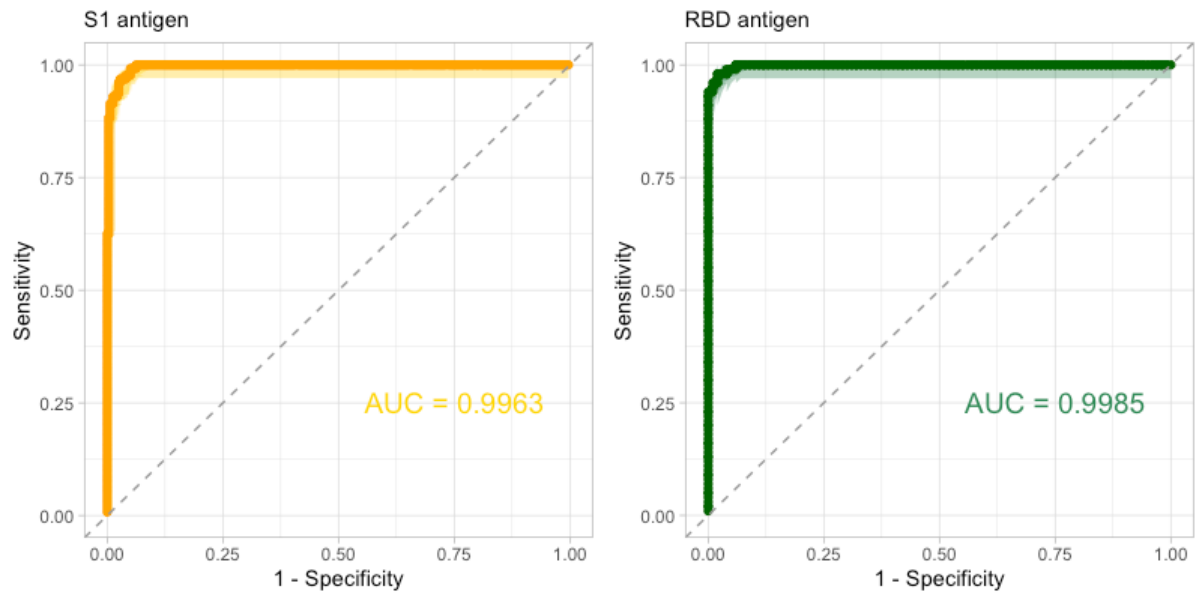

**Supplementary Figure 1:** Receiver operating characteristic (ROC) curves showing the true positive rate (sensitivity) and the false positive rate (1-specificity) of alternative cut-off values for S1 ELISA (left panel), and RBD (receptor binding domain) ELISA (right panel). Data for ROC analyses consisted of corrected-absorbance values for 320 pre-COVID19 negative, and 128 confirmed COVID-19 positive controls. Shading shows 95% confidence intervals.
