# Supplementary material
Source: PubMed Central journal article supplement (PMC8006418)
Supplement: jiaa788_suppl_supplementary_figure_2.pdf [file jiaa788_suppl_supplementary_figure_2.pdf]

## Supplementary Figure 2

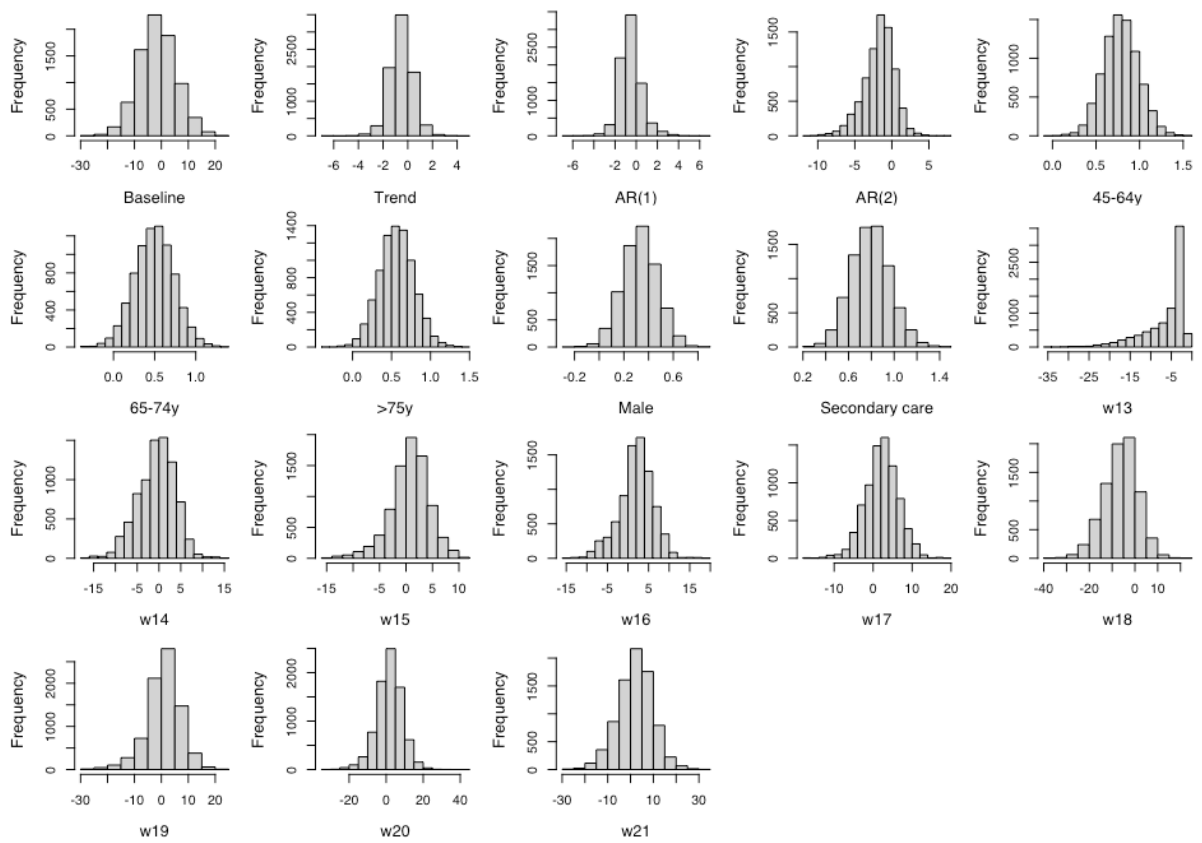

Supplementary Figure 2. State-space model posterior distribution for the key parameters.
